# Supplementary material
Source: MDPI journal article supplement (https://www.mdpi.com/2225-1154/11/12/231)
Supplement: s1 [file s1 › climate-2513551-supplementary.pdf]

## Supplementary Materials

Table S1. Keywords used for data and information search

| Subsection                                                  | Keywords                                                                                                                                                                                                                                                                                               |
|-------------------------------------------------------------|--------------------------------------------------------------------------------------------------------------------------------------------------------------------------------------------------------------------------------------------------------------------------------------------------------|
| 3.1 Material requirement                                    | Material footprint + energy<br>technology<br>Material requirement + energy<br>technology<br>Material requirement + solar<br>Material requirement + wind<br>Material requirement + nuclear<br>Material requirement + geothermal<br>Material requirement + hydrogen<br>Material requirement + hydropower |
| 3.2 Present and future energy<br>availability               | Levelized cost + energy<br>LCOE + energy<br>LCOE + solar<br>LCOE + wind<br>LCOE + nuclear<br>LCOE + hydrogen<br>LCOE + hydropower<br>LCOE + geothermal<br>Forecasted + LCOE<br>LCOE + 2050                                                                                                             |
| 3.3 Air pollution and accidents<br>with health implications | Carbon dioxide emissions by fuel or<br>industry<br>Life cycle CO <sub>2</sub> emissions + energy<br>Air pollution + mortality + energy<br>Accidents + mortality + energy                                                                                                                               |
